# Supplementary material for: Unconventional CHδ+⋯N hydrogen bonding interactions in the stepwise solvation of the naphthalene radical cation by hydrogen cyanide and acetonitrile molecules
Source: Royal Society of Chemistry journal article supplement (doi:10.1039/c5cp06502j), 2015-12-09
Supplement: c5cp06502j1.pdf [file c5cp06502j1.pdf]

# Unconventional $\text{CH}^{\delta+} \dots \text{N}$ Hydrogen Bonding Interactions in the Stepwise Solvation of the Naphthalene Radical Cation by Hydrogen Cyanide and Acetonitrile Molecules

Sean P. Platt, Isaac K. Attah and M. S. El-Shall\*

Department of Chemistry, Virginia Commonwealth University  
Richmond, VA 23284-2006

Rifaat Hilal<sup>a,b</sup>, Shaaban A. Elroby<sup>a,c</sup> and Saadullah G. Aziz<sup>a</sup>

<sup>a</sup>) Department of Chemistry, Faculty of Science, King Abdulaziz University  
Jeddah 21589, Saudi Arabia

<sup>b</sup>) Department of Chemistry, Faculty of Science, Cairo University, Giza, Egypt

<sup>c</sup>) Department of Chemistry, Faculty of Science, Beni-Seif University, Beni-Suef, Egypt

## Supporting Information

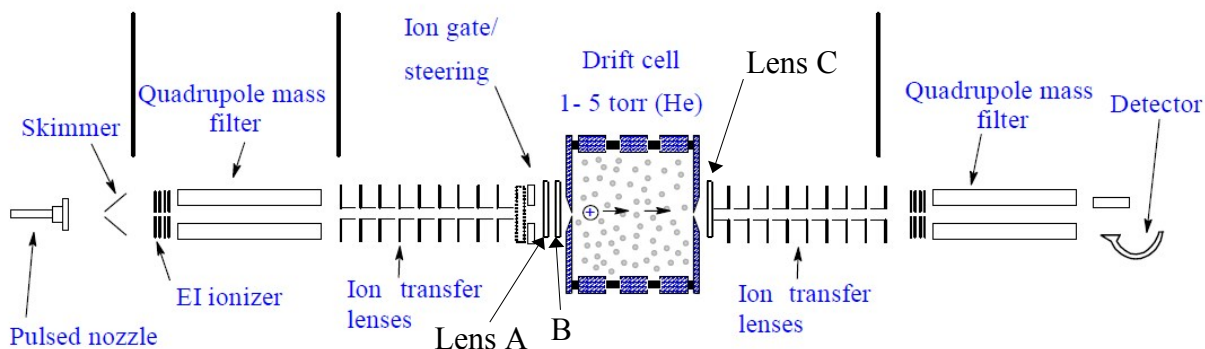

**Figure S1.** Schematic diagram of the mass-selected ion mobility tandem mass spectrometer at VCU.
